# Supplementary material for: Effects of n-3 polyunsaturated fatty acid on metabolic status in women with polycystic ovary syndrome: a meta-analysis of randomized controlled trials
Source: Springer Nature journal article supplement (doi:10.1186/s13048-023-01130-4), 2023-03-17
Supplement: MOESM1 [file 24637948]

Table S1. Search Strategy for Pubmed

| Database | Search Strategy                                                                                                                                                                                                                                                                                                                                                                                                                                                                                                                                                                                                                                                                                                                                                                                                                                                                                                                                                                                                                                                                                                                                                                                                                                                                                                                                                                                                                                                                                                                                                                                                                                                                                                                                                                                                                                                                                                                                                                                                                                                           |
|----------|---------------------------------------------------------------------------------------------------------------------------------------------------------------------------------------------------------------------------------------------------------------------------------------------------------------------------------------------------------------------------------------------------------------------------------------------------------------------------------------------------------------------------------------------------------------------------------------------------------------------------------------------------------------------------------------------------------------------------------------------------------------------------------------------------------------------------------------------------------------------------------------------------------------------------------------------------------------------------------------------------------------------------------------------------------------------------------------------------------------------------------------------------------------------------------------------------------------------------------------------------------------------------------------------------------------------------------------------------------------------------------------------------------------------------------------------------------------------------------------------------------------------------------------------------------------------------------------------------------------------------------------------------------------------------------------------------------------------------------------------------------------------------------------------------------------------------------------------------------------------------------------------------------------------------------------------------------------------------------------------------------------------------------------------------------------------------|
| PubMed   | <p>"Fatty Acids, Omega-3"[Mesh] OR "n 3 polyunsaturated fatty acid"[Title/Abstract] OR "omega 3 fatty acid"[Title/Abstract] OR "acid omega 3 fatty"[Title/Abstract] OR "fatty acid omega 3"[Title/Abstract] OR "omega 3 fatty acids"[Title/Abstract] OR "oil n 3"[Title/Abstract] OR "n 3 oil"[Title/Abstract] OR "oil n3"[Title/Abstract] OR "n 3 fatty acids"[Title/Abstract] OR "omega 3 fatty acids"[Title/Abstract] OR "pufa n 3"[Title/Abstract] OR "n 3 pufa"[Title/Abstract] OR "n3 fatty acid"[Title/Abstract] OR "n3 pufa"[Title/Abstract] OR "pufa n3"[Title/Abstract] OR "n3 polyunsaturated fatty acid"[Title/Abstract] OR "n 3 oils"[Title/Abstract] OR "n 3 fatty acid"[Title/Abstract] OR "acid n 3 fatty"[Title/Abstract] OR "fatty acid n 3"[Title/Abstract] OR "n 3 fatty acid"[Title/Abstract] OR omega-3 [Title/Abstract] OR "n-3 Polyunsaturated fatty acids" [Title/Abstract] OR "omega-3 polyunsaturated fatty acid" [Title/Abstract]</p> <p>OR</p> <p>"fish oil" [Title/Abstract] OR "fish oils" [Title/Abstract] OR promega[Title/Abstract] OR "super epa" [Title/Abstract] OR superepa[Title/Abstract] OR "tuna oil" [Title/Abstract] OR "tuna oils" [Title/Abstract] OR icosapentaenoic[Title/Abstract] OR docosahexaenoic[Title/Abstract] OR linolenic[Title/Abstract] OR eicosapentaenoic[Title/Abstract] OR alpha-linolenic[Title/Abstract] OR EPA[Title/Abstract] OR DHA[Title/Abstract]</p> <p>AND</p> <p>"polycystic ovary syndrome"[MeSH Terms] OR "ovary syndrome polycystic"[Title/Abstract] OR "syndrome polycystic ovary"[Title/Abstract] OR "stein leventhal syndrome"[Title/Abstract] OR "stein leventhal syndrome"[Title/Abstract] OR "syndrome stein leventhal"[Title/Abstract] OR "sclerocystic ovarian degeneration"[Title/Abstract] OR "sclerocystic ovary syndrome"[Title/Abstract] OR "polycystic ovarian syndrome"[Title/Abstract] OR "ovarian syndrome polycystic"[Title/Abstract] OR "polycystic ovary syndrome"[Title/Abstract] OR "sclerocystic ovaries"[Title/Abstract] OR "sclerocystic ovary"[Title/Abstract]</p> |

Table S2. Specific indicators and values involved in all included studies

| Study               | Adiponectin (ng/ml) |           | Apo-B(g/L)   |           | Apo-A(g/L)   |            | BW (kg)      |           | BMI (kg/m <sup>2</sup> ) |            | WC(cm)       |              |
|---------------------|---------------------|-----------|--------------|-----------|--------------|------------|--------------|-----------|--------------------------|------------|--------------|--------------|
|                     | Intervention        | Control   | Intervention | Control   | Intervention | Control    | Intervention | Control   | Intervention             | Control    | Intervention | Control      |
| Amini 2018          | -                   | -         | -            | -         | -            | -          | 66.9±12.7    | 67.9±12.9 | 25.6±4.7                 | 25.8±4.4   | -            | -            |
| Cussons 2009        | -                   | -         | -            | -         | -            | -          | -            | -         | 34.8±6.6                 | 35.1±7.0   | -            | -            |
| Ebrahimi 2017       | -                   | -         | -            | -         | -            | -          | 71.9±10.7    | 74.8±18.3 | 27.8±4.3                 | 28.3±6.7   | -            | -            |
| Jamilian 2018       | -                   | -         | -            | -         | -            | -          | 72.5±10.0    | 72.2±17.2 | 27.1±3.8                 | 27.0±7.1   | -            | -            |
| Khani 2017          | -                   | -         | -            | -         | -            | -          | -            | -         | 30.08±3.39               | 31.61±3.57 | 81.18±2.87   | 84.22±2.61   |
| Mejia-Montilla 2018 | 5.3±1.4             | 3.8±1.2   | 94.5±12.6    | 86.2±12.9 | 118.0±17.0   | 119.1±15.6 | -            | -         | 25.7±3.1                 | 26.2±2.8   | -            | -            |
| Mirmasoumi 2017     | -                   | -         | -            | -         | -            | -          | 70.1±11.9    | 69.9±16.2 | 26.9±5.0                 | 26.6±5.4   | -            | -            |
| Mohammadi 2012      | 13.5±2.41           | 12.0±3.10 | -            | -         | -            | -          | 73.4±8.88    | 75.1±9.88 | 28.6±3.30                | 28.8±2.94  | 90.9±6.14    | 91.3±6.48    |
| Nadjarzadeh 2015    | 5.62±2.68           | 4.65±3.14 | -            | -         | -            | -          | -            | -         | 31.17±5.93               | 31.83±3.68 | 98.77±14.55  | 102.27±10.20 |
| Rahmani 2016        | -                   | -         | -            | -         | -            | -          | 73.8±10.8    | 77.4±18.3 | 28.2±4.6                 | 29.0±6.5   | -            | -            |
| Talari 2018         | -                   | -         | -            | -         | -            | -          | -            | -         | -                        | -          | -            | -            |

Table S2. Continued

| Study      | hs-CRP (mg/L) |         | QUICKI       |           | FPG (mg/dL)  |          | FINS (μIU/mL) |          | HOMA-IR      |         | TG (mg/dL)   |          |
|------------|---------------|---------|--------------|-----------|--------------|----------|---------------|----------|--------------|---------|--------------|----------|
|            | Intervention  | Control | Intervention | Control   | Intervention | Control  | Intervention  | Control  | Intervention | Control | Intervention | Control  |
| Amini 2018 | 3.7±1.9       | 4.8±1.5 | 0.34±0.01    | 0.33±0.02 | 87.1±6.8     | 89.6±4.4 | 10.2±2.9      | 12.3±4.2 | 2.2±0.7      | 2.7±0.9 | 113.4±57.2   | 105±47.9 |



Abbreviations: BW, body weight; BMI, body mass index; DHA, docosahexaenoic acid; EPA, eicosapentaenoic acid; FPG, fasting plasma glucose; FINS, fasting insulin; HDL-C, high-density lipoprotein cholesterol; HOMA-IR, homeostatic model of assessment for insulin resistance; hs-CRP, high sensitivity C-reactive protein; LDL-C, low-density lipoprotein cholesterol; n-3 PUFA, n-3 polyunsaturated fatty acid; QUICK, quantitative insulin sensitivity check index; TC, total cholesterol; TG, triglycerides; VLDL-C: very low density lipoprotein-cholesterol.
