# Supplementary material for: Effects of n-3 polyunsaturated fatty acid on metabolic status in women with polycystic ovary syndrome: a meta-analysis of randomized controlled trials
Source: Springer Nature journal article supplement (doi:10.1186/s13048-023-01130-4), 2023-03-17

**Fig.S1.** Forest plots of HDL-C (a) and LDL-C (b) levels after sensitivity analysis among PCOS patients

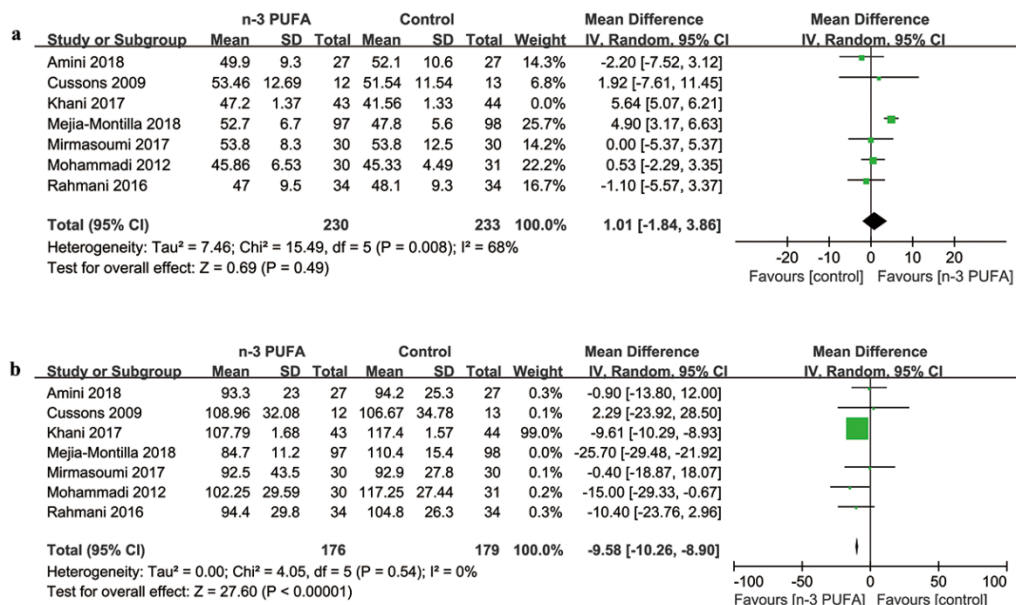

Supplement: MOESM2 [file 24637948]
